# Supplementary material
Source: ML conference proceedings conference paper supplement (https://openaccess.thecvf.com/content/ICCV2023/html/Gong_ToonTalker_Cross-Domain_Face_ICCV_2023_paper.html)
Supplement: Supplementary file 1 [file Gong_ToonTalker_Cross-Domain_Face_ICCV_2023_supplemental.zip]

Archive with 2 entries (2 files):
- 08738-supp/08738-supp.pdf
- 08738-supp/08738-video.mp4
